# Supplementary material
Source: MDPI journal article supplement (https://www.mdpi.com/2504-3900/8/1/60)

# **Development and feasibility of a low-cost, Pacific community-focussed, weight management programme in Glen Innes, Auckland**

Sue Pirrit – NZ Registered Nutritionist

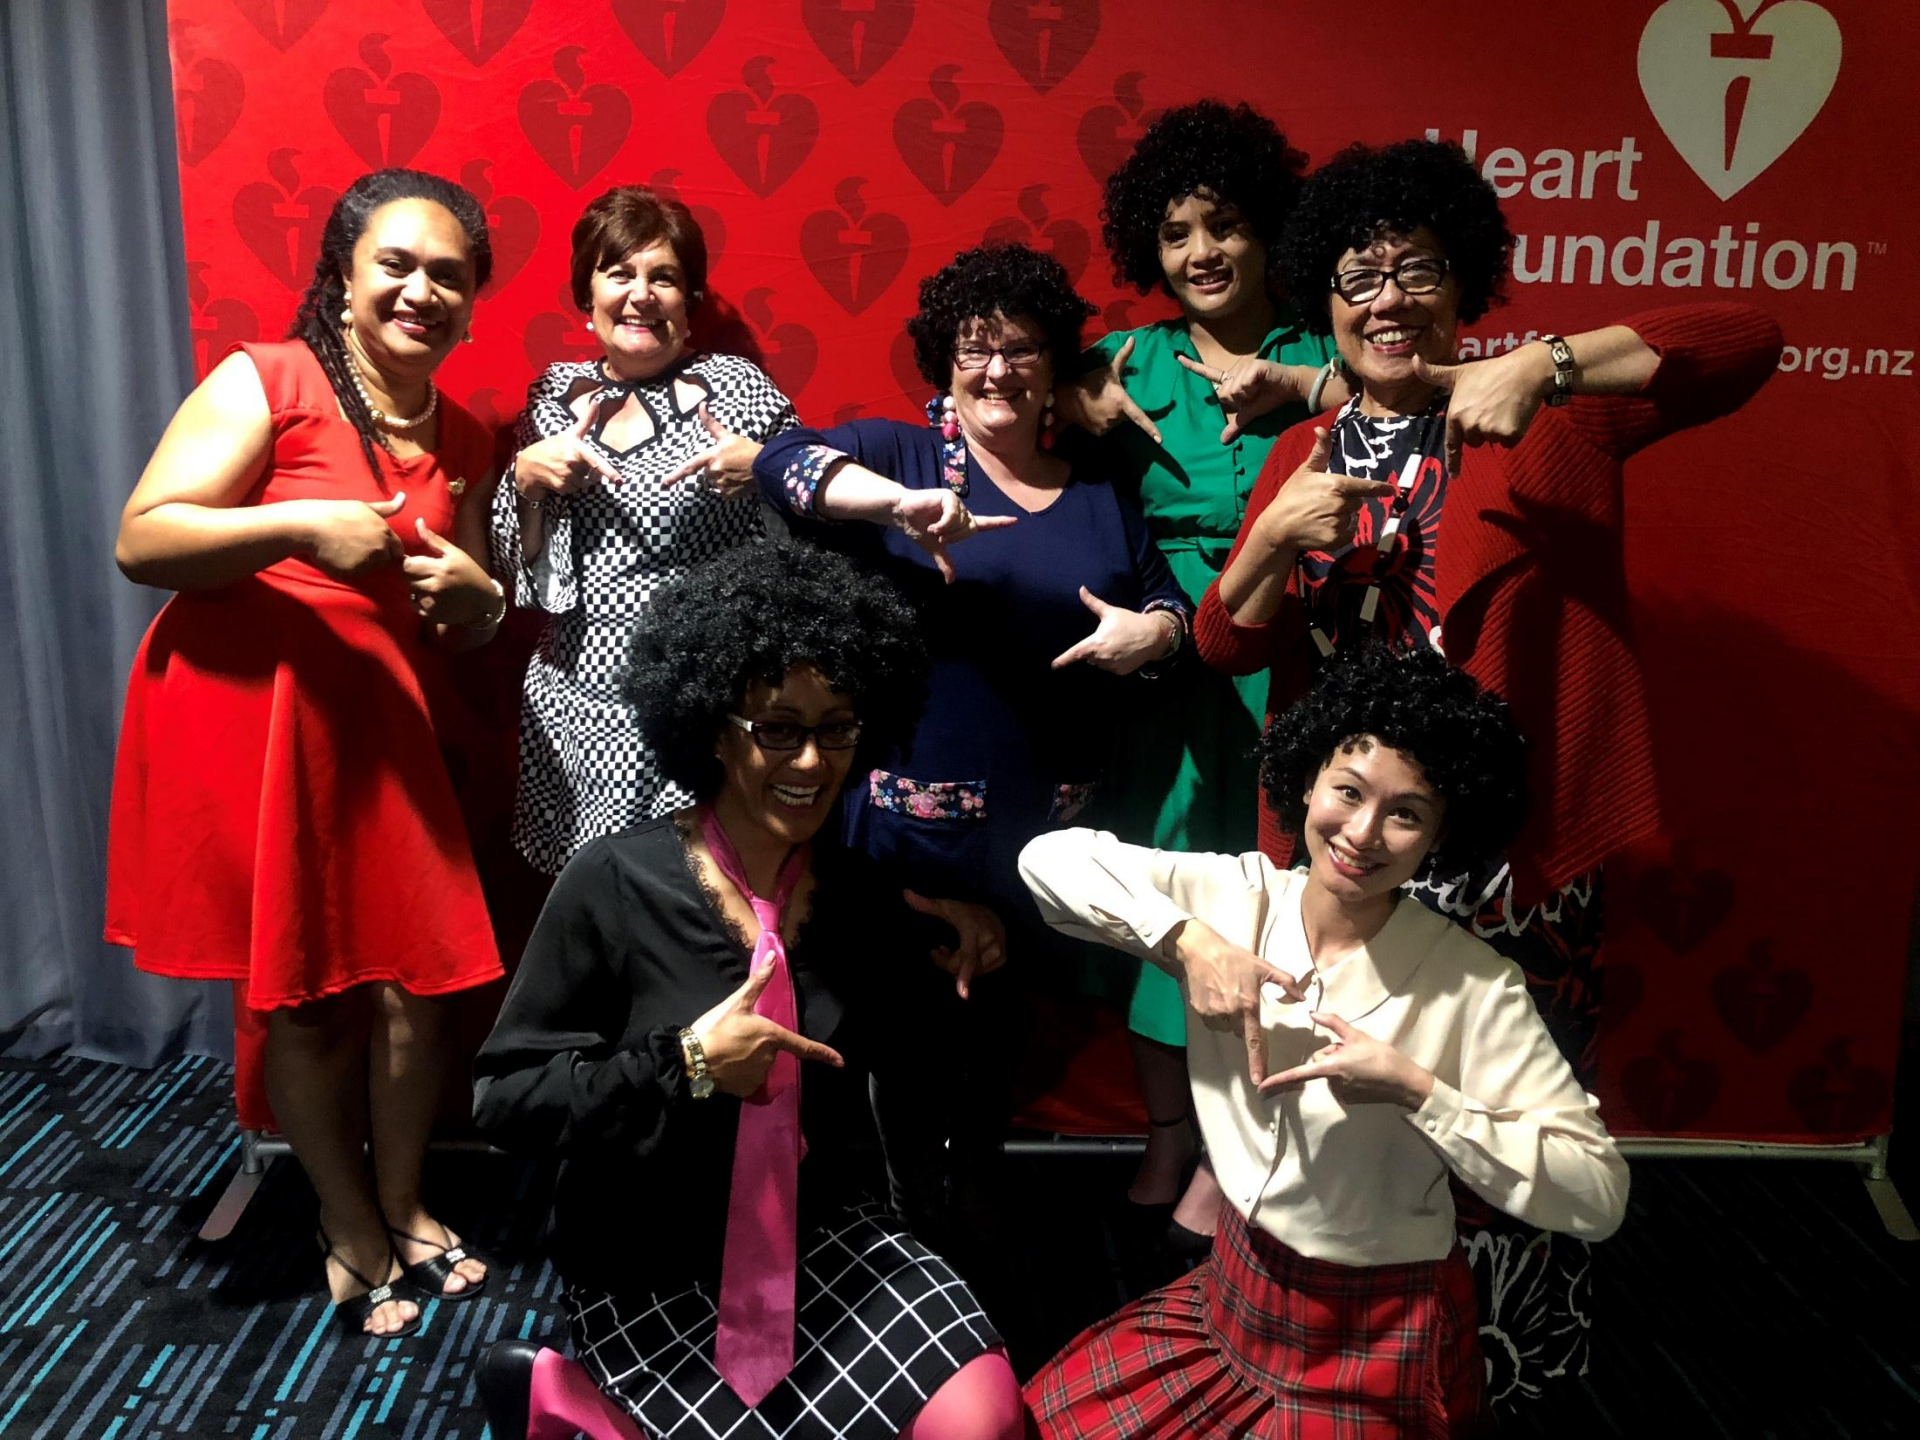



# Pacific Heartbeat Location

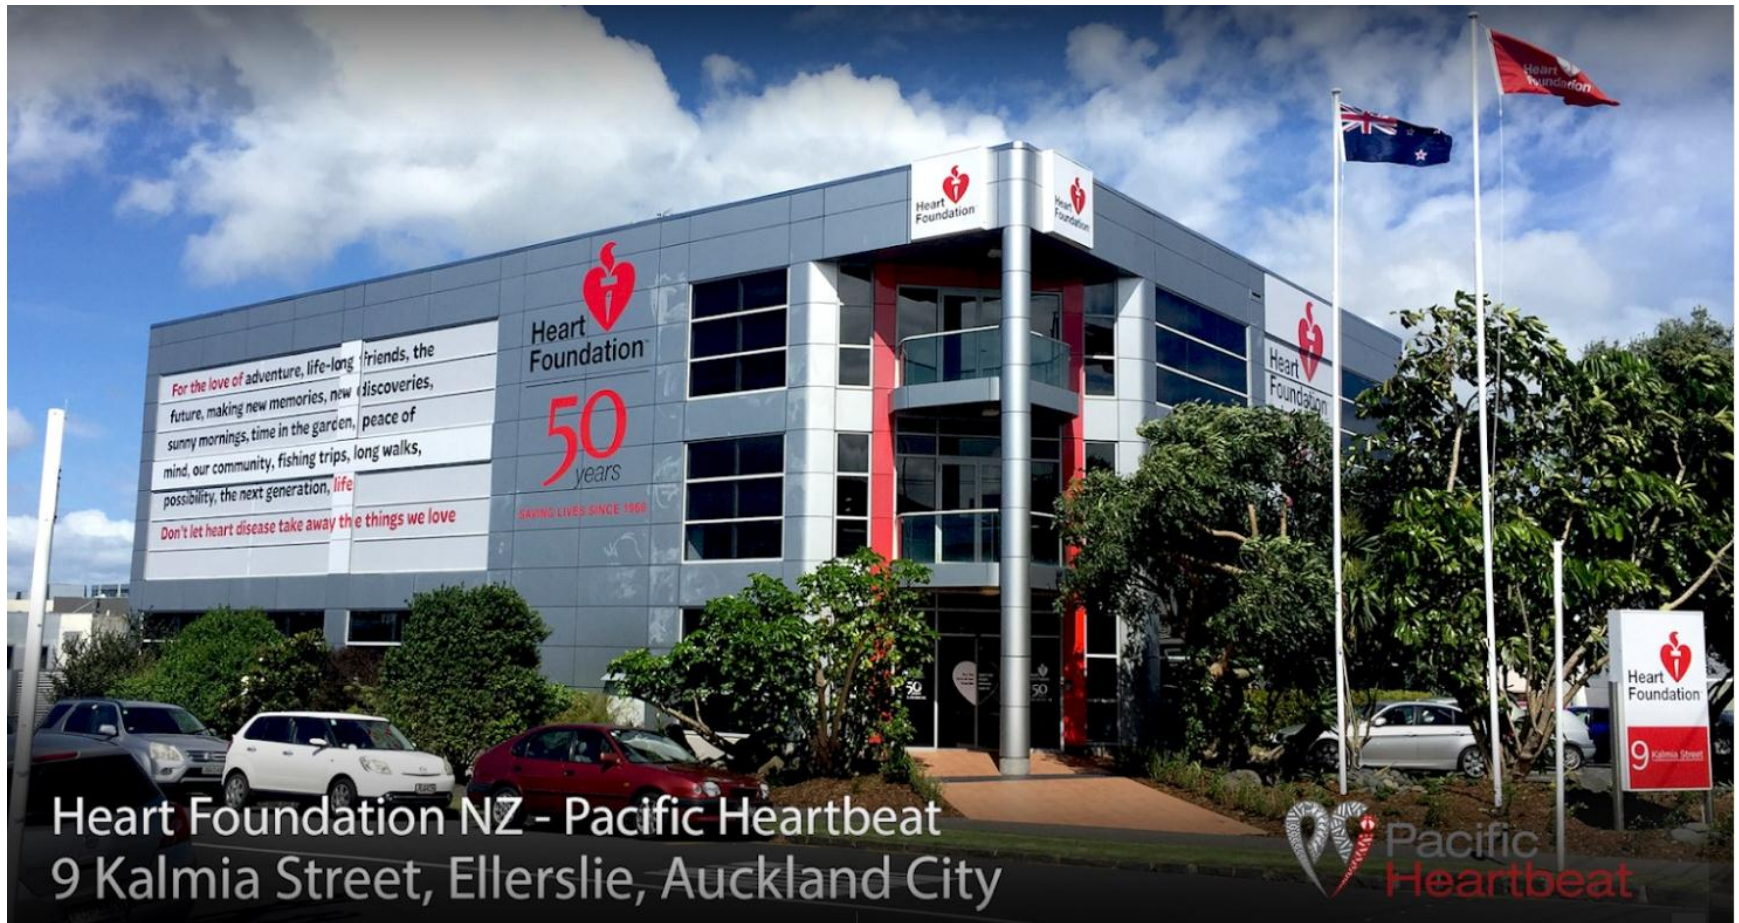

# Pacific Heartbeat's core Business

MISSION

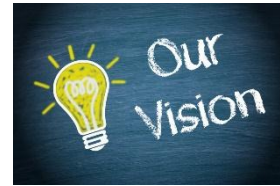

Pacific  
Heartbeat

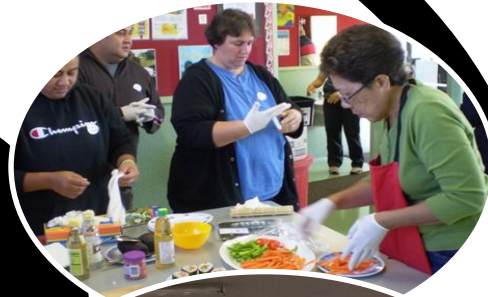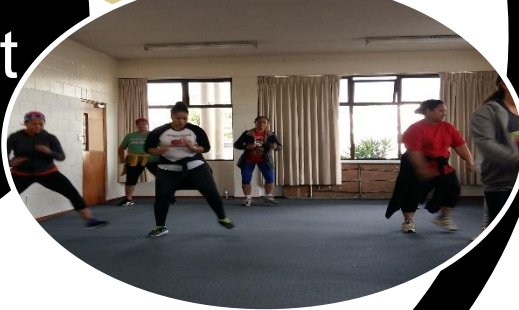

Nutrition

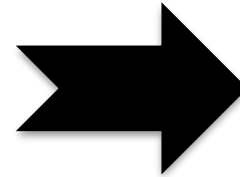

Physical  
Activity

**STOP**

Nzers  
dying early  
from Heart  
Disease

and

**HELP**

people with  
Heart  
Disease to  
live full and  
productive  
lives

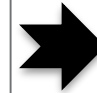

**Hearts fit  
for life, for  
this  
generation  
& the next**

# Why are we doing this?

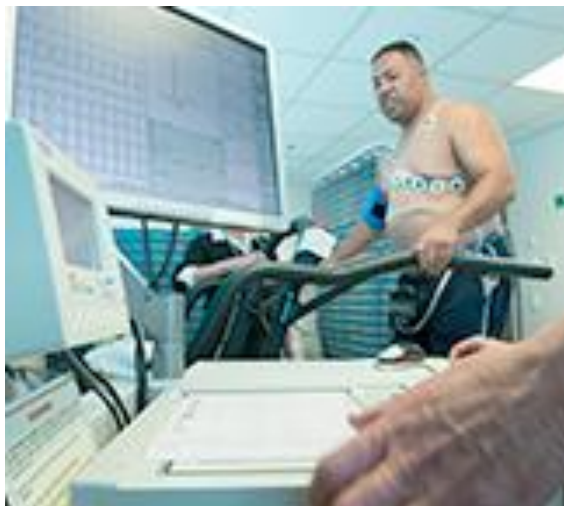

Pacific peoples have the **highest** rates of:

- **Obesity**
- **Heart disease**
- **Diabetes**
- Around **1 in 4** Pacific adults **smoke** in NZ
- Pacific people do **less P.A.**

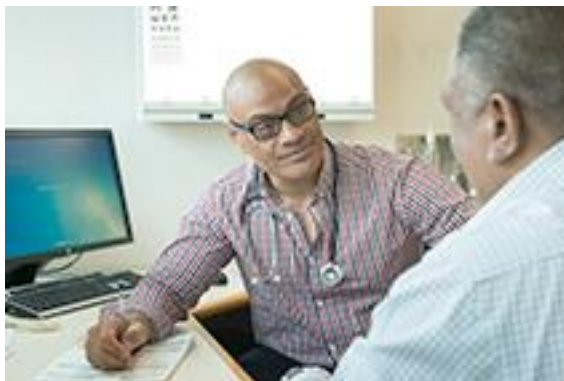

# Pacific Heart Stats

**1 in 3 Pacific** and Maori deaths from heart disease happen between **ages 35-65**, compared to **1 in 14 for non-Pacific**. Heart disease is a **disease of middle age** for Pacific people

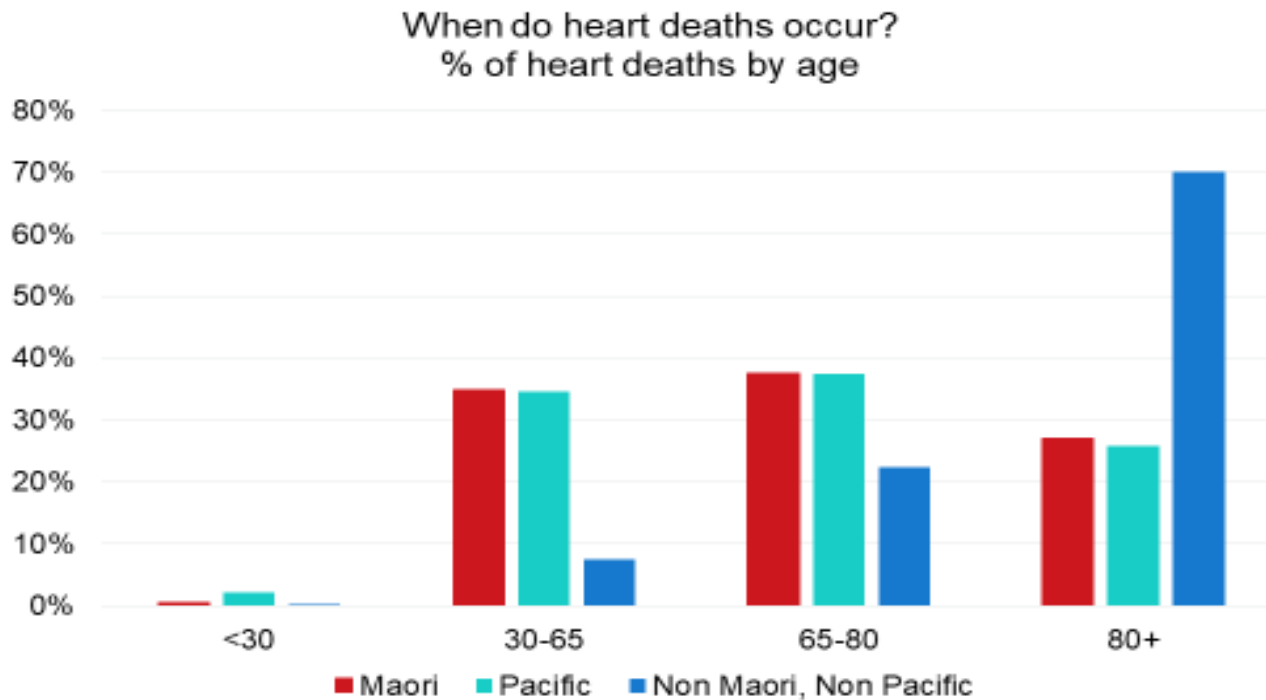

2015 data courtesy of MoH. Data requested December 2017

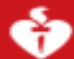

2015 data courtesy of MOH. Data requested December 2017

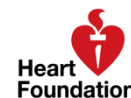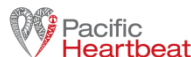



# NZ Weight Management Guidelines & Evidence

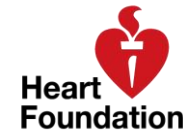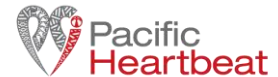

## MOH FAB Strategies (Food, Activity & Behaviour)

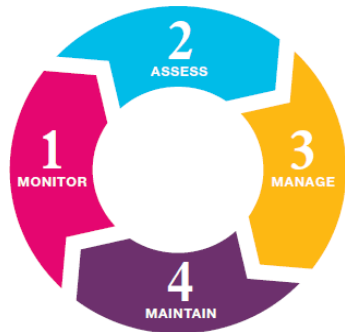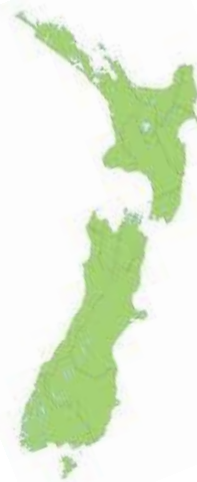

## NZ Public Health Specialists

- **comprehensive approach** be adopted
- Incorporating improvements to the **obesogenic food environment**
- Coupled with **behaviour weight management programmes.**

## NZ Dietary Counselling Reviews:

- **modest** and **short-term**
- Improved with **dose intensity**
- **↓ BP, cholesterol, BMI** (body mass index)
- **↓ WC** (waist circumference) and **Weight**
- **↑ fruit and vegetable** intakes
- **↓ sodium** intakes
- **↑ P.A.** levels

## INTERNATIONAL Reviews:

- prove effective

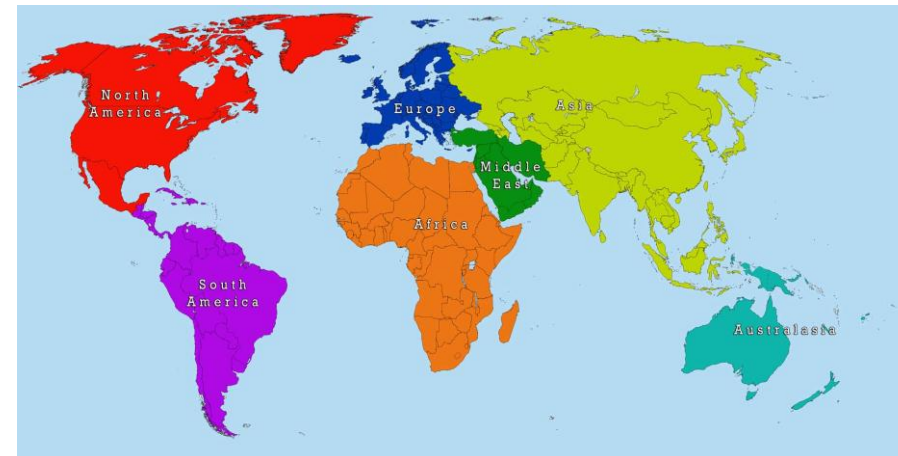

# Current Programmes

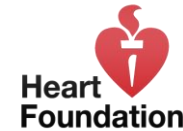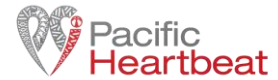

## Auckland-based Programmes:

- **Green Prescription** –day-time
- **Casual** e.g. bootcamps
- **PHB** 'train-the-trainer' style courses
- **Commercial** programmes e.g. Weight Watchers

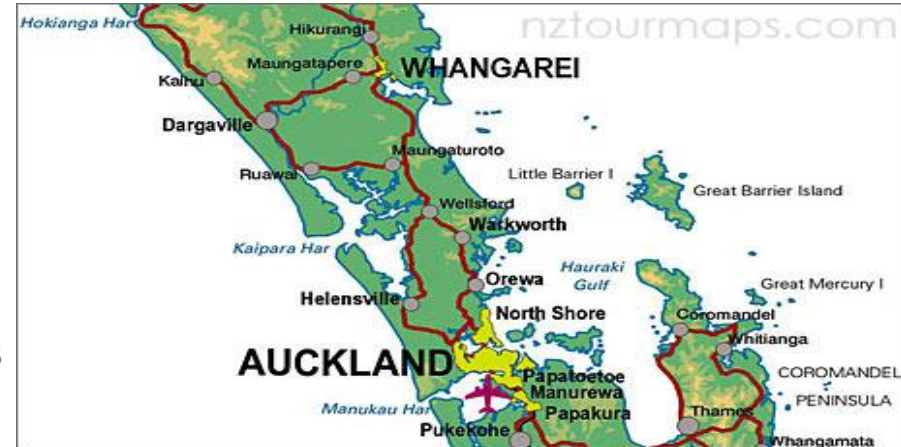

## Trial

### A Pacific-focussed Programme:

- **Community**-based
- **Weight management** programme
- To **improve** the **eating** and **activity** behaviours
- Incorporates **interactive** and '**talanoa**'-styles
- **Group support** strategies

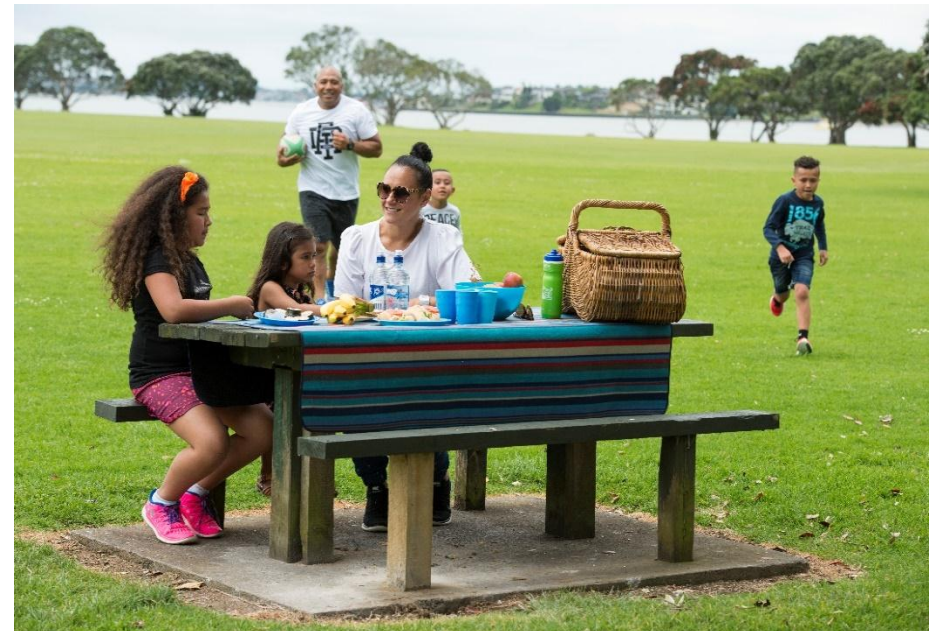



# Programme Format

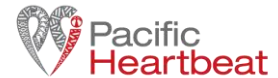

- 8 evenings/ 8 weeks – 1hour
- P.A.
- Talanoa and revision
- Nutrition sessions
- Goal setting
- Weigh-in
- Meal preparation and sharing

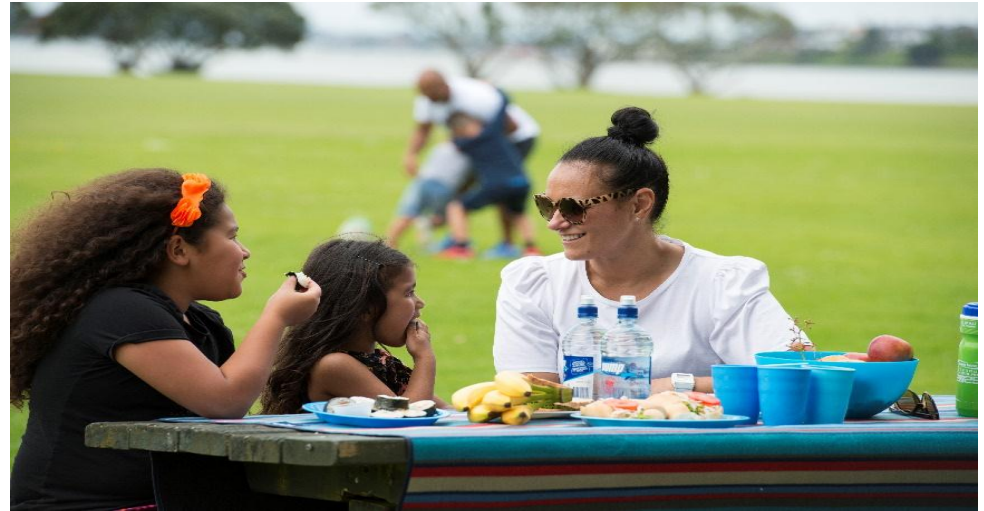

## Measures:

- Nutrition, P.A., Mindfulness pre and post Questionnaires
- WHO Quality of Life Questionnaire
- Weight

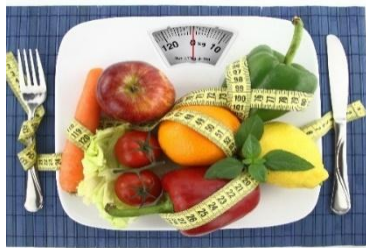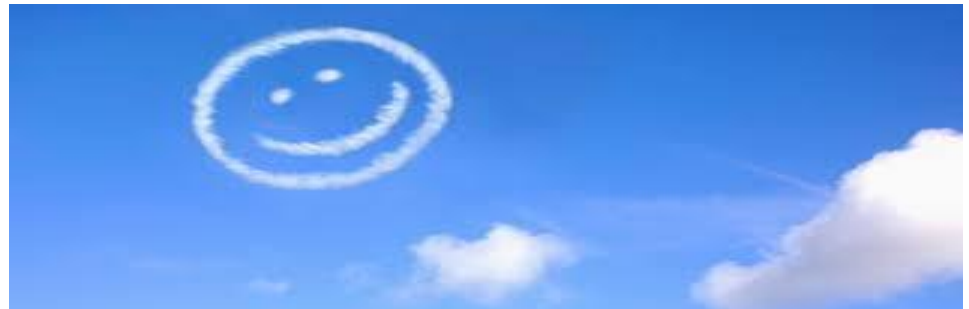



# **Eat Healthier?** **Be Stronger for your family?**

**Join our community programme**

**What will I do?**

Fun and easy **EXERCISES** • Short and fun **NUTRITION SESSIONS** • **GOAL SETTING** • **TIP SHARING** • Quick and easy **MEAL PREPARATION** •

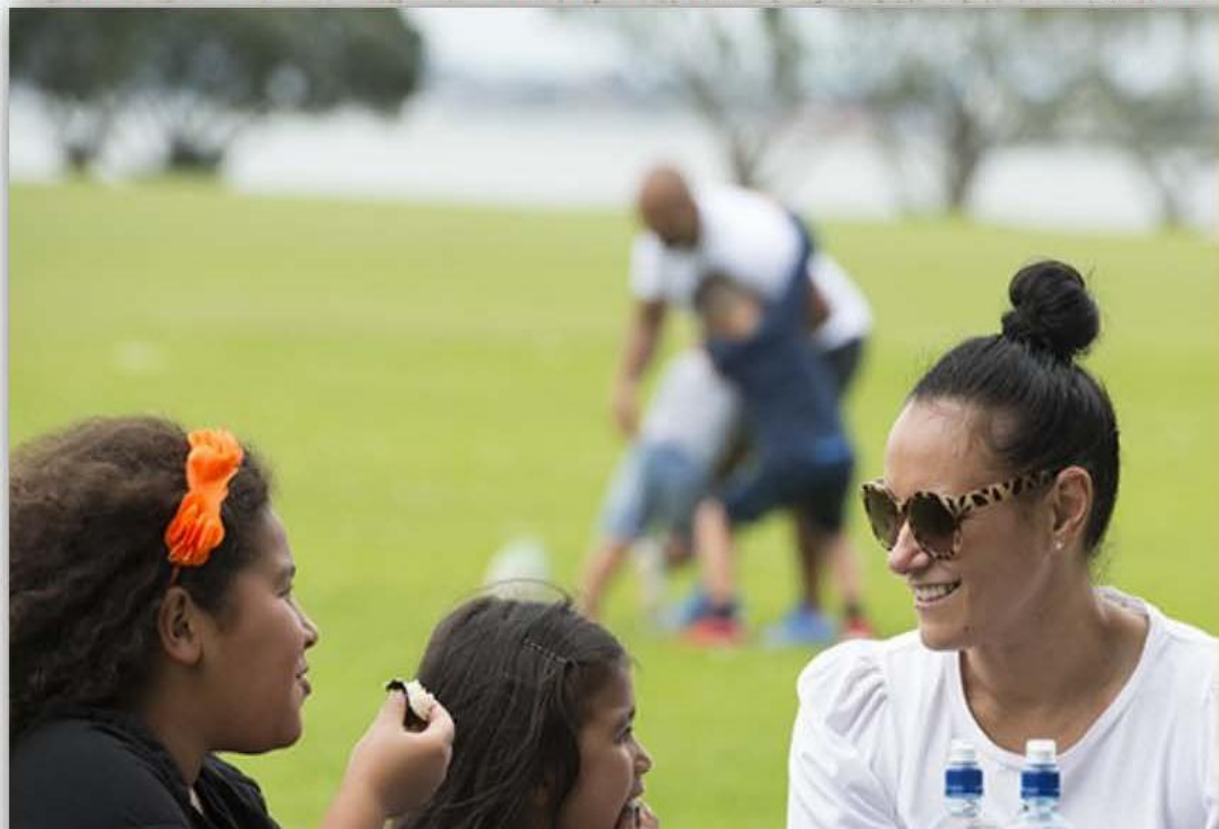

## **WHERE**

Glen Innes Community  
Centre

## **WHEN**

Wednesday evenings  
7-8PM

## **STARTING**

21st February, 2018

**REGISTER BY  
NOW!**

## **HOW LONG**

8 evenings



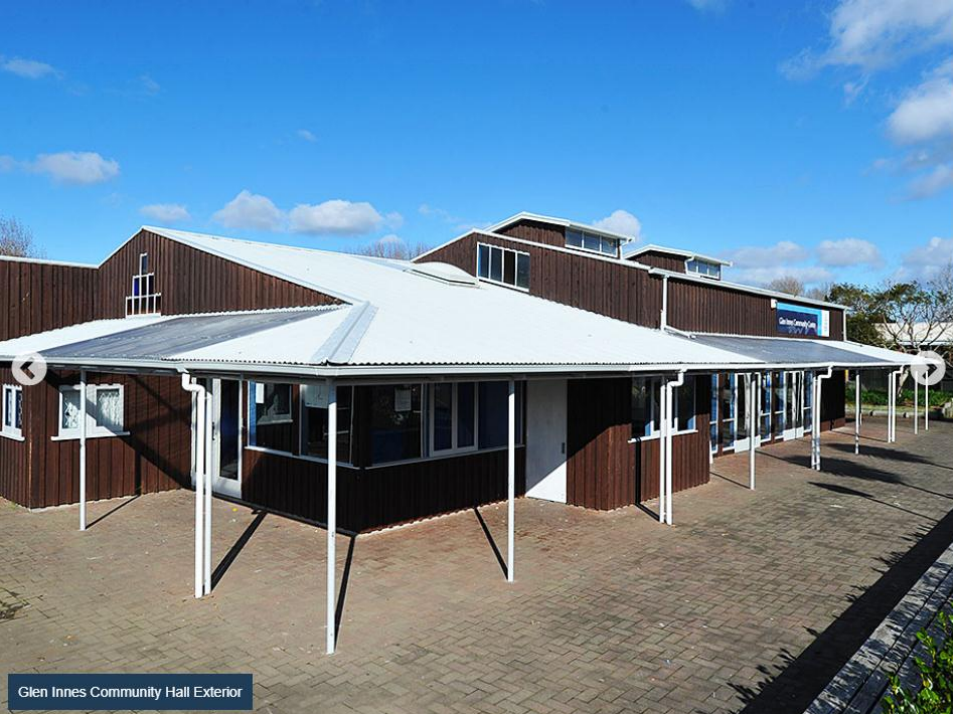

Glen Innes Community Hall Exterior

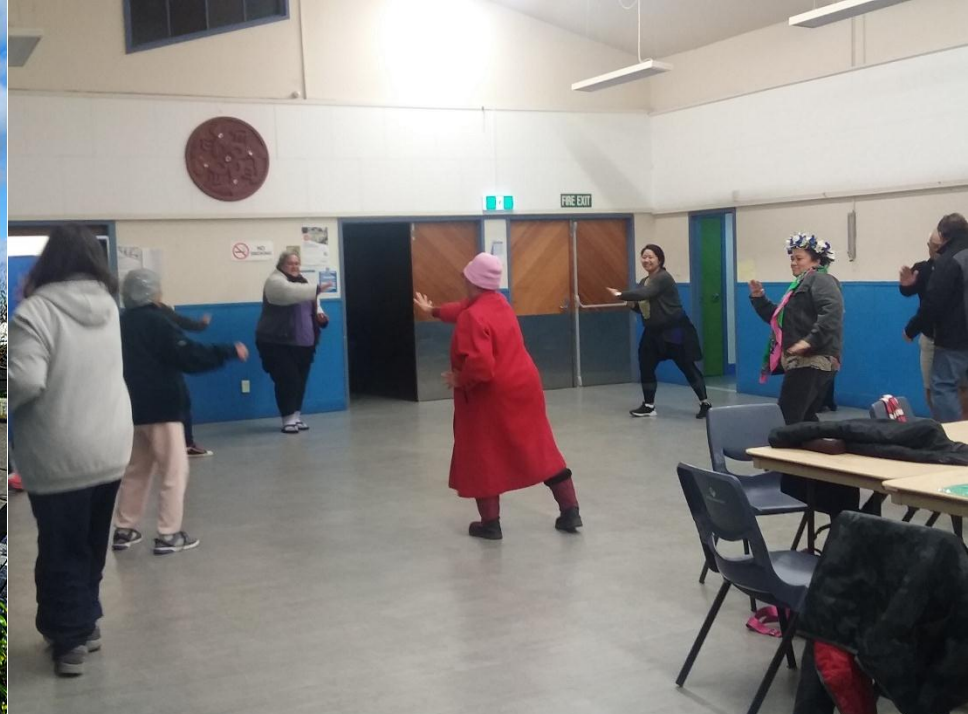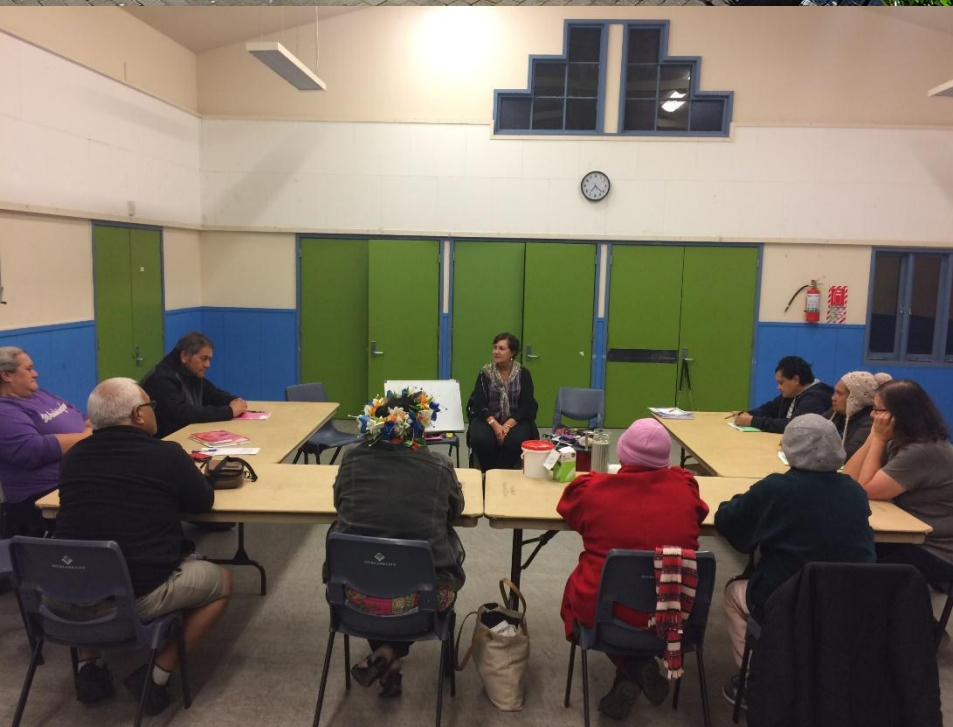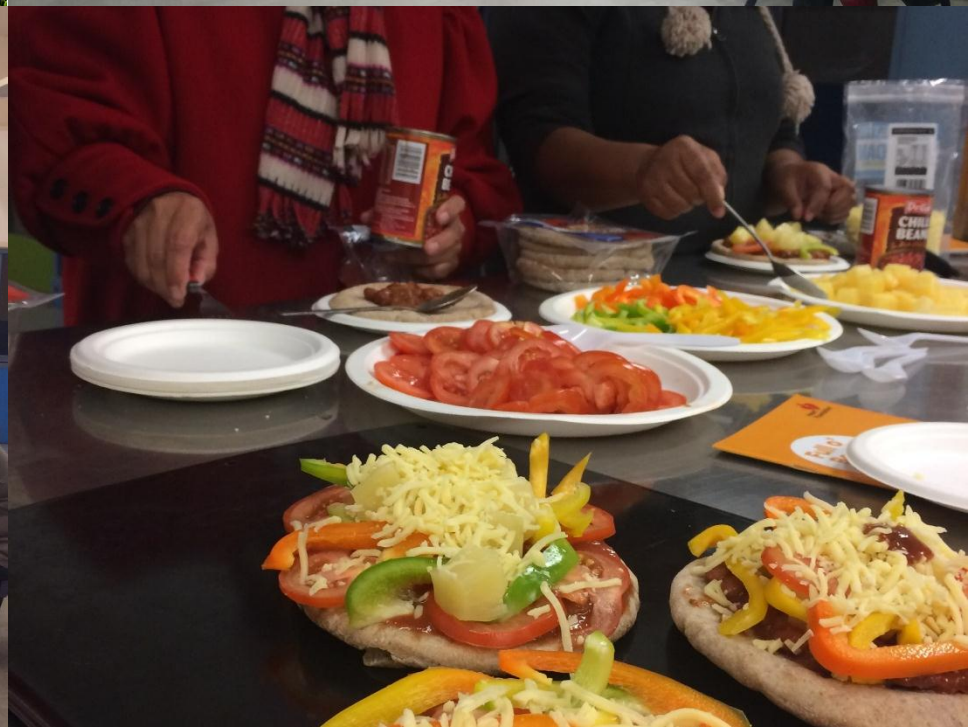



# How well did we do in our Glen Innes Healthy Lifestyle Programme?

We were **more**  
**thoughtful**  
about  
everything  
soooo..

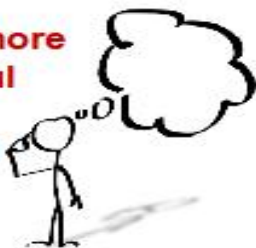

MUCH MORE  
**Veges & Fruit**  
was being eaten

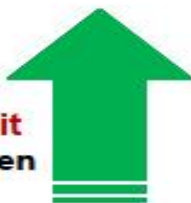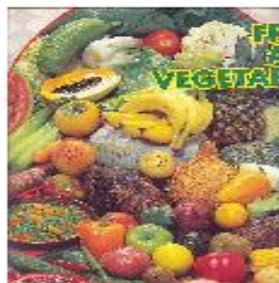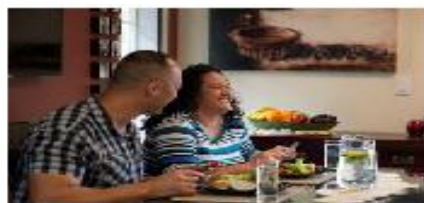

And **meals** were more  
**regular**,  
including **breakfast**

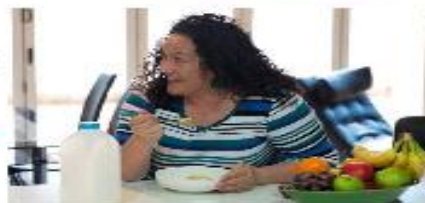

And there was more  
**reading of the NIP**

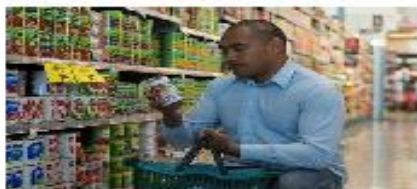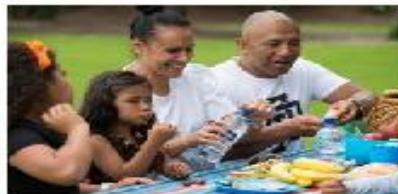

so less **takeaways**  
and **sugary drinks**  
were bought

More **exercise** was  
done

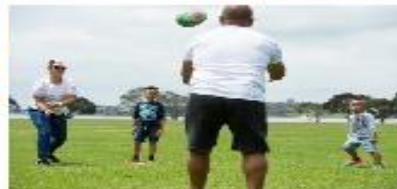

$\frac{1}{2}$  **lost weight** and  $\frac{1}{2}$   
stayed about the same

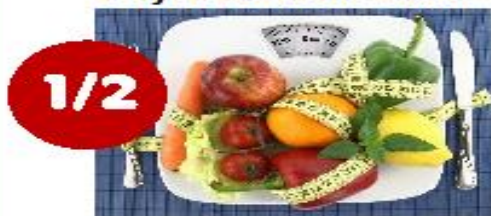

and **ALL** this lead to greater  
**Wellbeing**

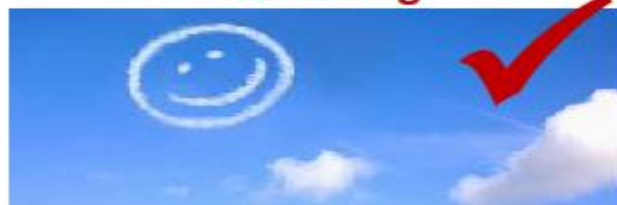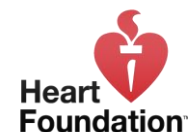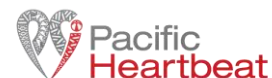

Contact Sue at [suep@heartfoundation.org.nz](mailto:suep@heartfoundation.org.nz)

# Learnings/Future

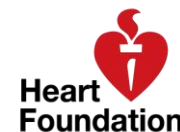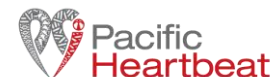

## Learnings:

- 2 x **Interchangeable facilitators** with **high E.Q.**
- Skilled in **facilitation** and **talanoa**
- And **both** with **Nutrition & P.A.** skills
- **6 week** duration & **1.5hours**/session
- **Face-to-face** programme **promotion** using
- **Community champions**

## Future:

- Embedded into **existing settings** e.g. churches/marae
- **Multi-ethnic** programmes
- Include **Family**
- Facilitator **Toolkit**
- **Paid facilitators** from the local community
- **Multi-site** rollout
- **Pre and Post Xmas** Programmes/**mid year** catch-up
- **Social media/email/text support** during/post programme

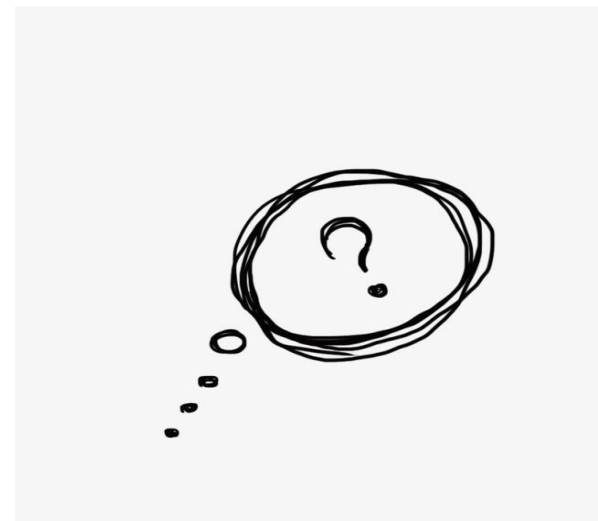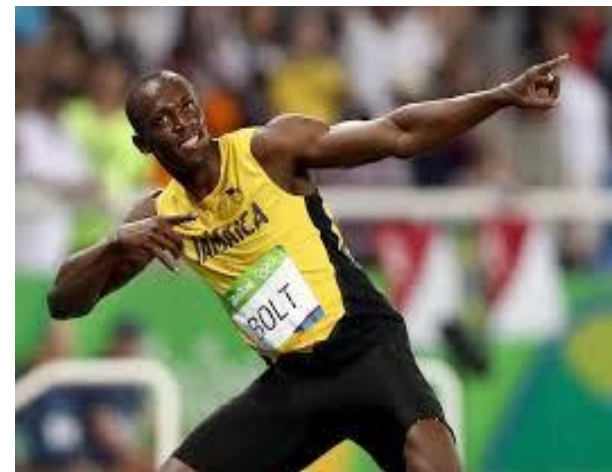

*"I just wanted to give you a brief update, my weight has been up and down and is up at the moment 😊 from a couple of personally bad late night snacking months, however you'll be pleased to know that despite briefly going back to old habits of mainly meat dishes, vegetables are now the main dishes at dinner time and Sunday toana'i (lunch). Our one pot meals have dropped from using 1 – 2 kg meat to around 500g with the rest made up of vegies for our stir fries and chow main dishes. We don't eat as much rice or potatoes nowadays but we now add some pasta and noodles to help bulk up the dishes and also nuts. I feel our carb intake has reduced also, we definitely don't eat as much bread. Taro mainly on Sundays. Oranges, Apples and bananas together with Green salads and/or Cole slaw with no added dressing is the norm nowadays, it is left to the individual to add their own dressing if desired.*

*We are a lot more aware of fats and portions. Takeaways are now rare in our household, maybe once a month vs maybe once a week. Your sessions were a definite help for my family.*

*I have to admit though that we came back on track around the time you got in contact again. So essentially, **in all seriousness**, it really does help to revisit these things to help people like me get back on track again."* Anna M

## **Special Thanks for their support with this project:**

Pacific Heartbeat/Heart Foundation  
Green Prescription and Gloria Tapaleou  
UOA – Jennifer Utter, Vili Nosa  
People of Glen Innes

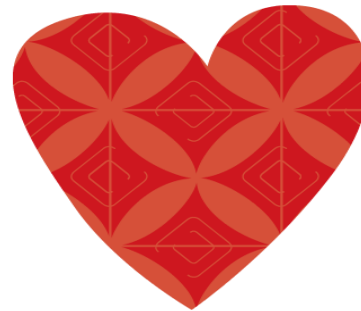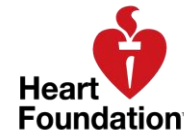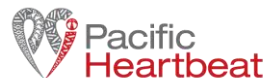

Supplement: s1 [file s1]
